# Supplementary material for: Gut-derived Enterococcus faecium from ulcerative colitis patients promotes colitis in a genetically susceptible mouse host
Source: PubMed Central journal article supplement (PMC6876129; doi:10.1186/s13059-019-1879-9), 2019-11-25
Supplement: 13059_2019_1879_MOESM2_ESM.pdf [file 13059_2019_1879_MOESM2_ESM.pdf]

# Additional file 2: Fig. S2

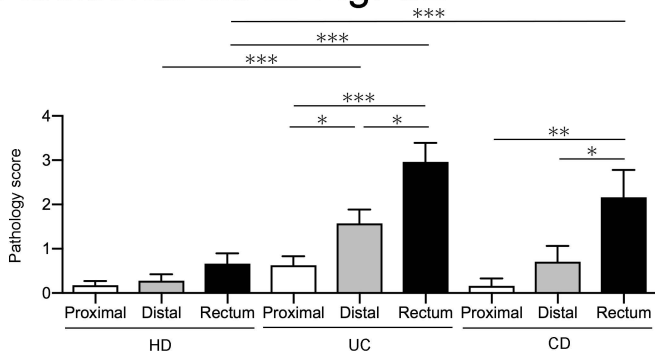

**Pathological analysis of colorectal segments of *Il10*<sup>-/-</sup> mice following fecal transplantation.** Fecal suspensions from HD, UC, or CD subjects were transplanted into flora-depleted *Il10*<sup>-/-</sup> mice as described in Figure 2. Pathology scores for each segment, including the proximal colon, distal colon, and rectum, were calculated separately. Statistical differences between two values were analyzed using a Mann-Whitney U test. \*, P < 0.05; \*\*, P < 0.01; \*\*\*, P < 0.001.

# Additional file 2: Fig. S3

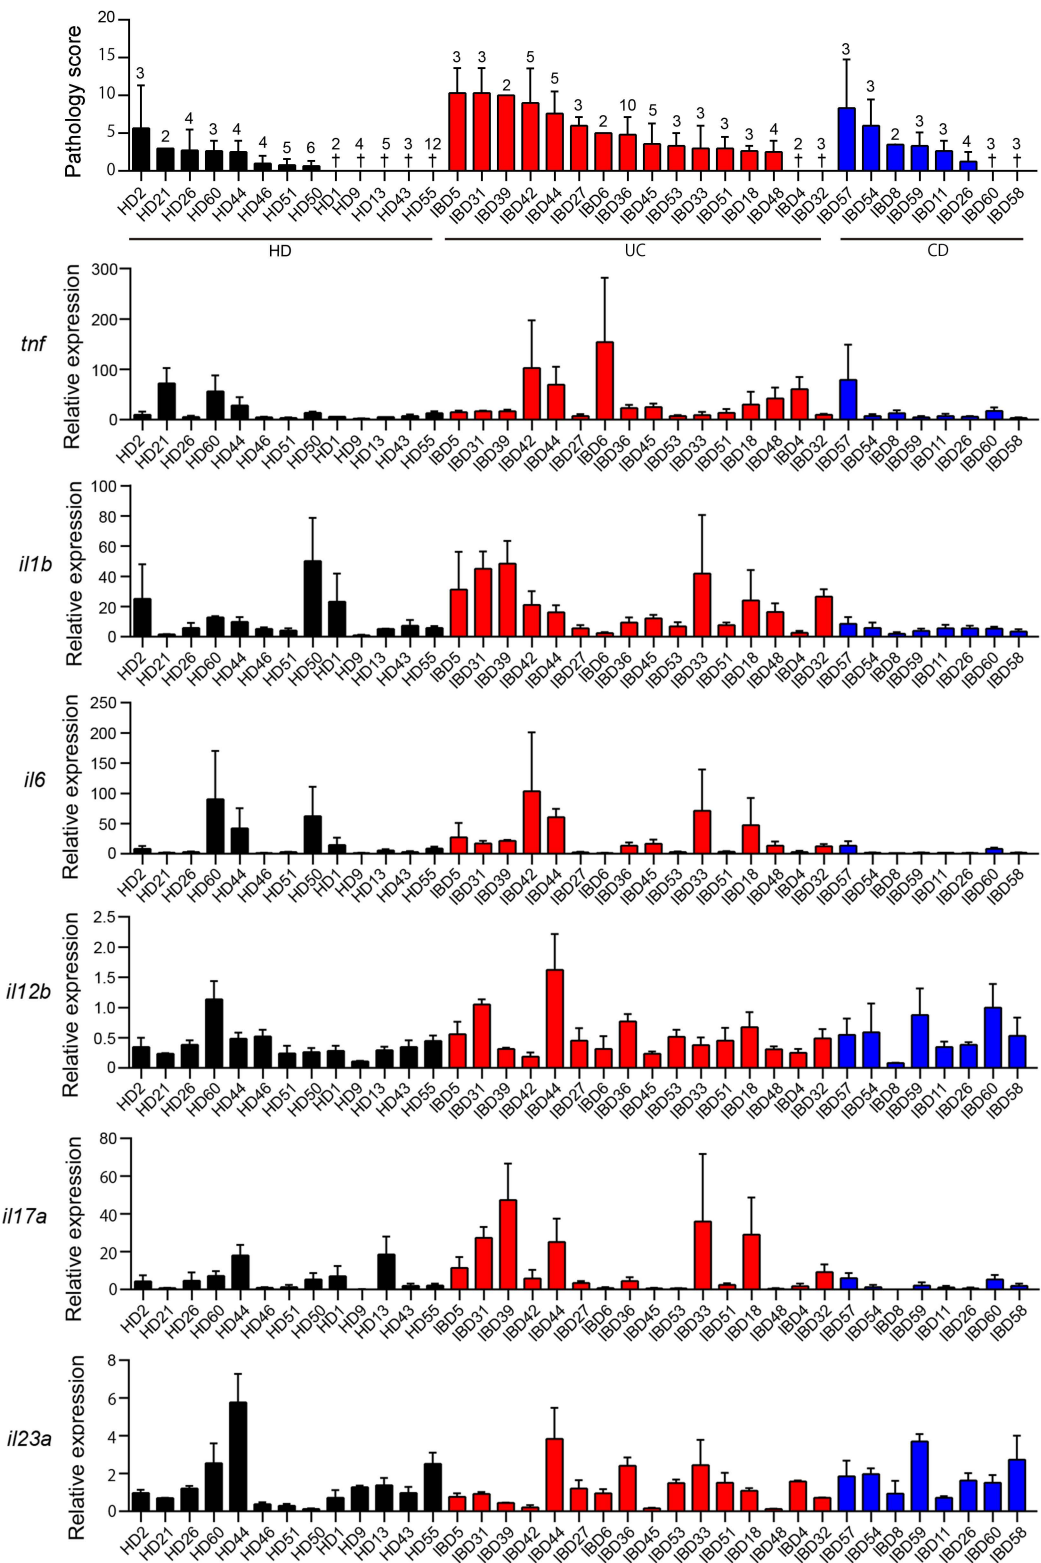

**Cytokine expression of colon in individual groups of mice.** Mean cytokine expression in mouse colon corresponding to individual fecal donors. The identification codes of individual subjects are shown on the X-axis, and correspond to those in Figure 2. Mean  $\pm$  SE. The numbers above the error bars indicate the number of mice in each category.

# Additional file 2: Fig. S4

Day 0 *E. faecium*

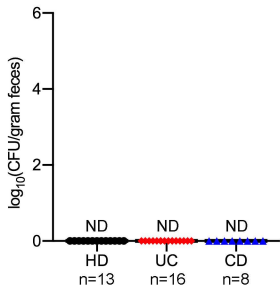

Day 28 *E. faecium*

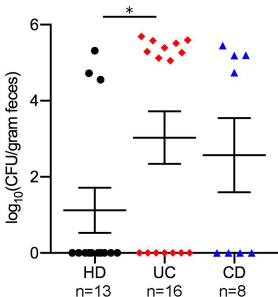

**Quantitation of *E. faecium* in mice by culture after fecal transplantation.** Colony-forming units (CFU) of *E. faecium* in feces of mice before or 28 days after fecal transplantation. Feces of representative mice corresponding to the 37 subjects was examined. Mean  $\pm$  SE. \*,  $P < 0.05$ .

# Additional file 2: Fig. S5

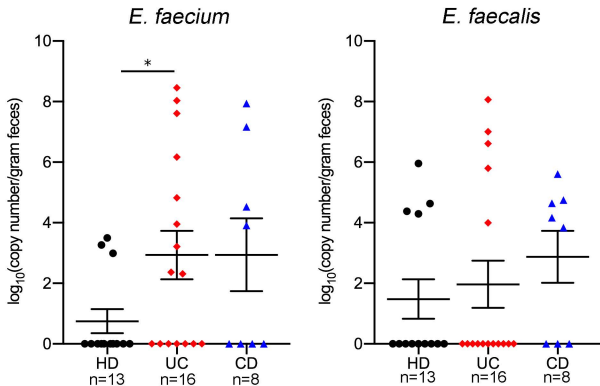

**Quantitation of *E. faecium* and *E. faecalis* in mice by PCR after fecal transplantation.** Copy number of *E. faecium* (left) or *E. faecalis* (right) in feces of mice after fecal transplantation. Feces of representative mice corresponding to the 37 subjects was examined. Mean  $\pm$  SE. \*,  $P < 0.05$ .

# Additional file 2: Fig. S6

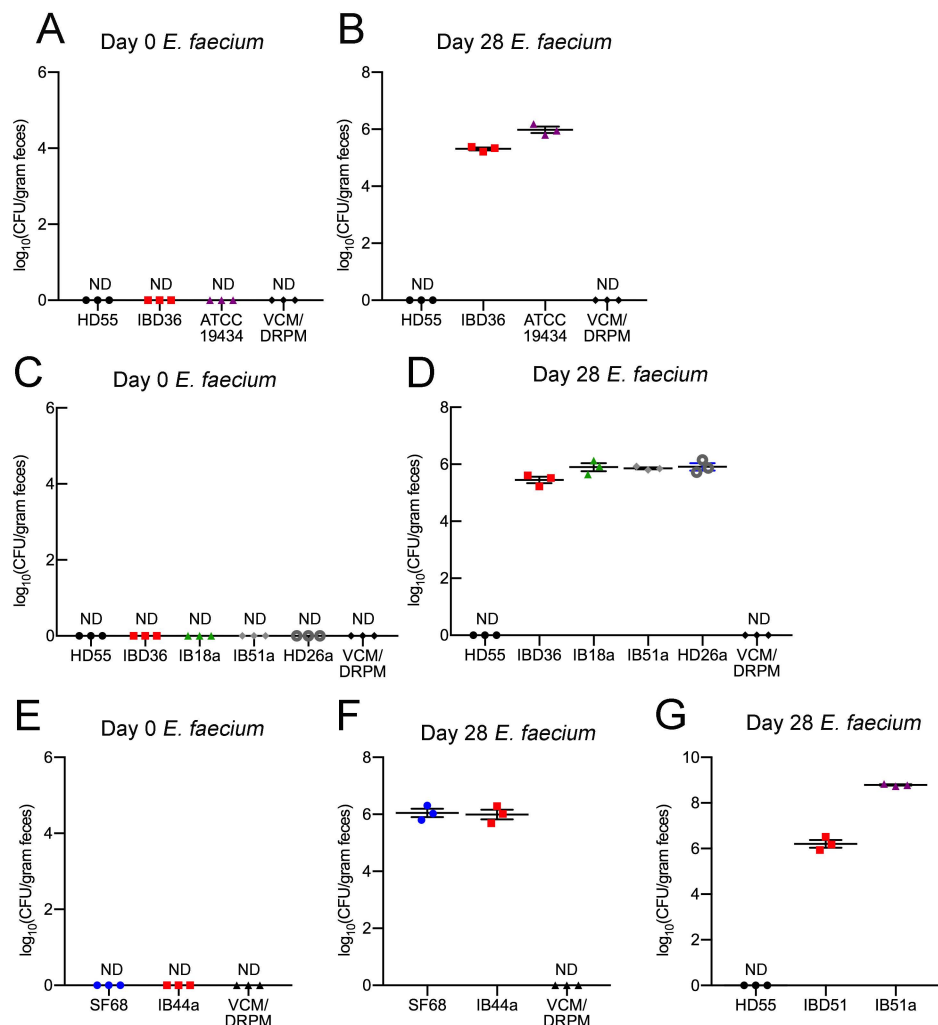

**Quantitation of *E. faecium* in mice by culture after *E. faecium* inoculation.**

CFU of *E. faecium* in feces of mice before or 28 days after fecal transplantation or inoculation of the indicated *E. faecium* strain. Feces of three representative mice from each group was examined. Mean ± SE. ND, not detected.

# Additional file 2: Fig. S7

## A

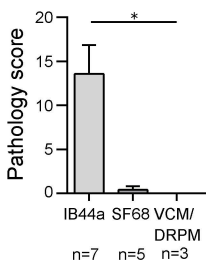

## B

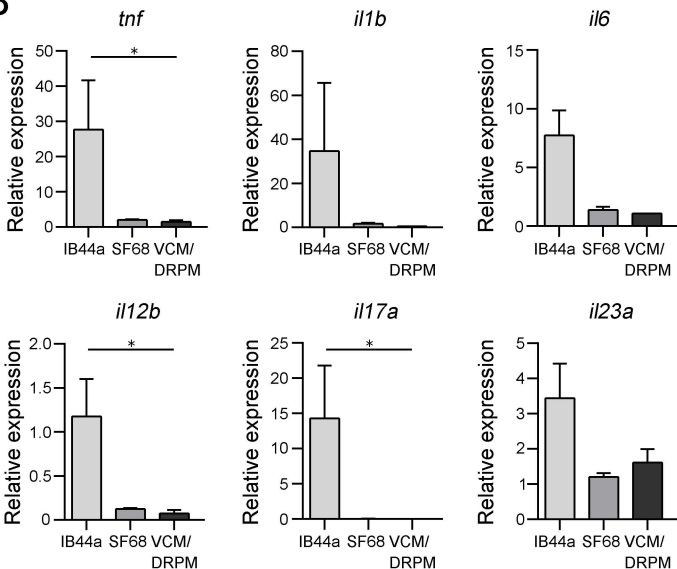

### Effect of inoculation with UC-derived or probiotic

*E. faecium* strain on colitis. UC-derived *E. faecium* strain IB44a or probiotic *E. faecium* strain SF68 was inoculated into flora-depleted *Il10<sup>-/-</sup>* mice. The control group was treated with antibiotics (VCM/DRPM) in the absence of transplantation. (a) Mean pathology scores of mice from each treatment group. (b) mRNA expression levels of inflammatory cytokines in the colon analyzed by real-time PCR. Statistical differences between a value and the microbiota-depleted control were analyzed using the Kruskal-Wallis test followed by Dunn's test. Mean  $\pm$  SE.

\*,  $P < 0.05$

# Additional file 2: Fig. S8

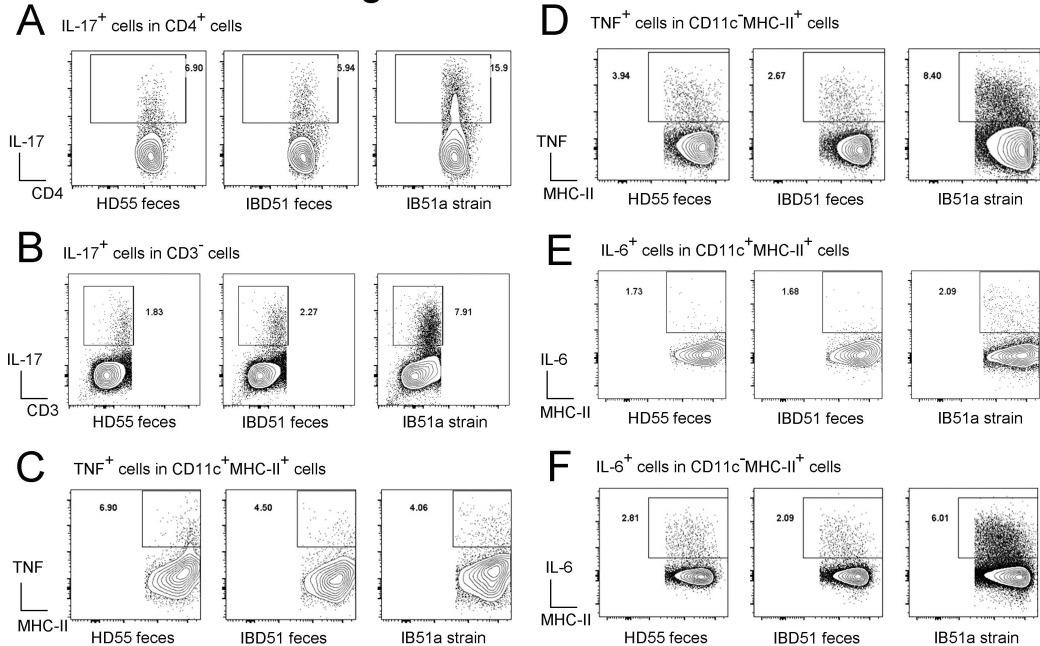

**Intracellular cytokine staining of colon lamina propria cells after inoculation of *E. faecium* strain IB51a.** This figure is related to Figure 6f. Germ-free *Il10*<sup>-/-</sup> mice received fecal transplantation from donor HD55 or IBD51, or were inoculated with *E. faecium* strain IB51a. After 21 days, single cells were obtained from colonic lamina propria and stained with antibodies to the indicated cytokines. Percentages of cytokine-positive cells are shown in the plots.
