# Supplementary material for: Gut-derived Enterococcus faecium from ulcerative colitis patients promotes colitis in a genetically susceptible mouse host
Source: PubMed Central journal article supplement (PMC6876129; doi:10.1186/s13059-019-1879-9), 2019-11-25
Supplement: 13059_2019_1879_MOESM4_ESM.pdf [file 13059_2019_1879_MOESM4_ESM.pdf]

# Additional file 4: Fig. S10

A

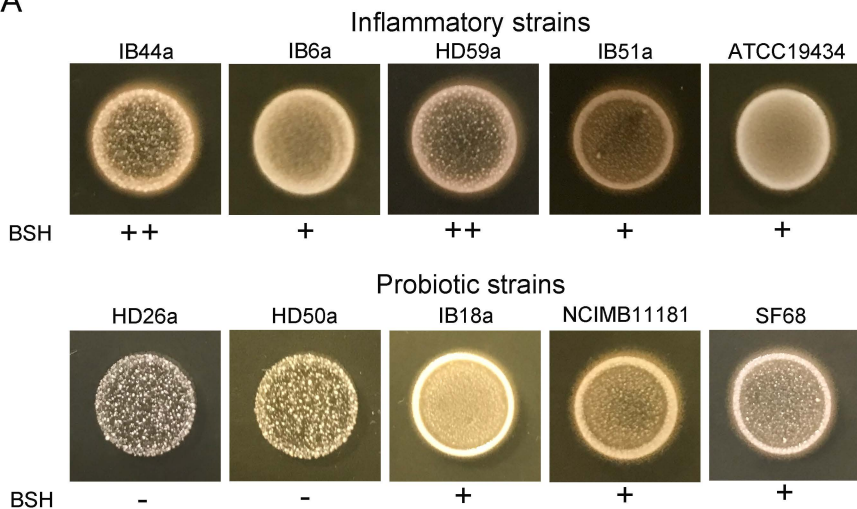

B

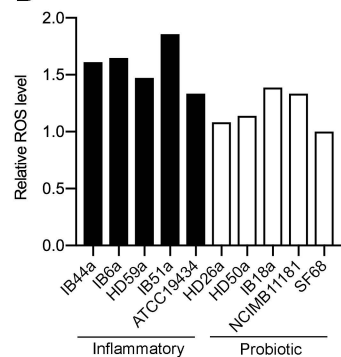

C

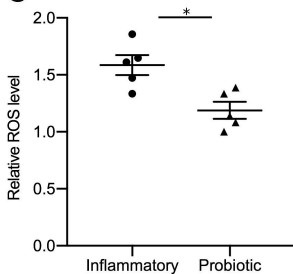

**Bile salt hydrolase (BSH) activity and reactive oxygen species (ROS)-generating ability in *E. faecium* strains.** (a) BSH activity of 10 *E. faecium* strains was evaluated in culture with glyco-conjugated deoxycholic acid (GDCA)-containing agar. If white zonal change of DCA appeared around colonies, BSH activity was considered positive. ++, the thickness of zone  $\geq 1.0$  mm; +,  $0 < \text{the thickness} < 1.0$  mm; -, no zonal change.

(b and c) Supernatant of culture with *E. faecium* strains was evaluated for presence of ROS. Relative ROS level in individual strains (b) and average ROS level in the inflammatory or the probiotic cluster (c) are shown. Mean  $\pm$  SE in (c). \*,  $P < 0.05$ .

# Additional file 4: Fig. S11

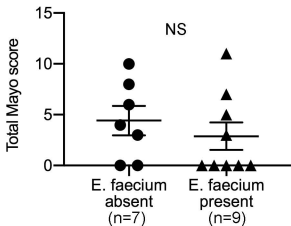

Presence of *E. faecium* in feces of UC patients on treatment is not associated with disease activity. Total Mayo score of 16 UC patients is shown according to the presence of *E. faecium* in feces determined by quantitative PCR. NS, not significantly different.
